# Supplementary material
Source: PubMed Central journal article supplement (PMC3037637)

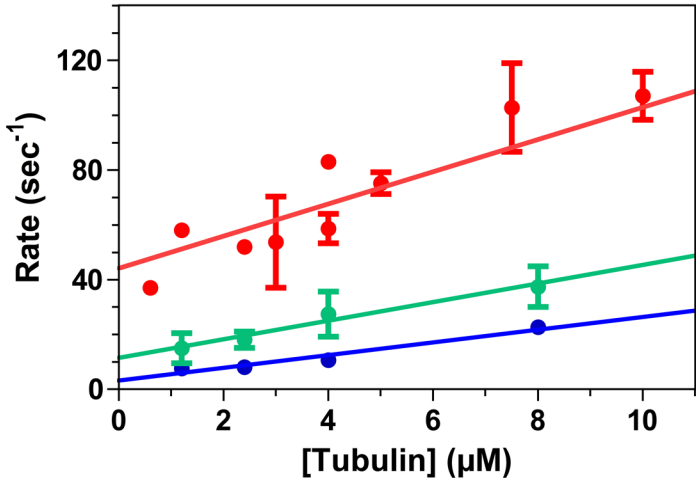

Supplement: supp_M110.192930_jbc.M110.192930-4.pdf [file supp_M110.192930_jbc.M110.192930-4.pdf]

# WT vs. mutant $\Delta L5$

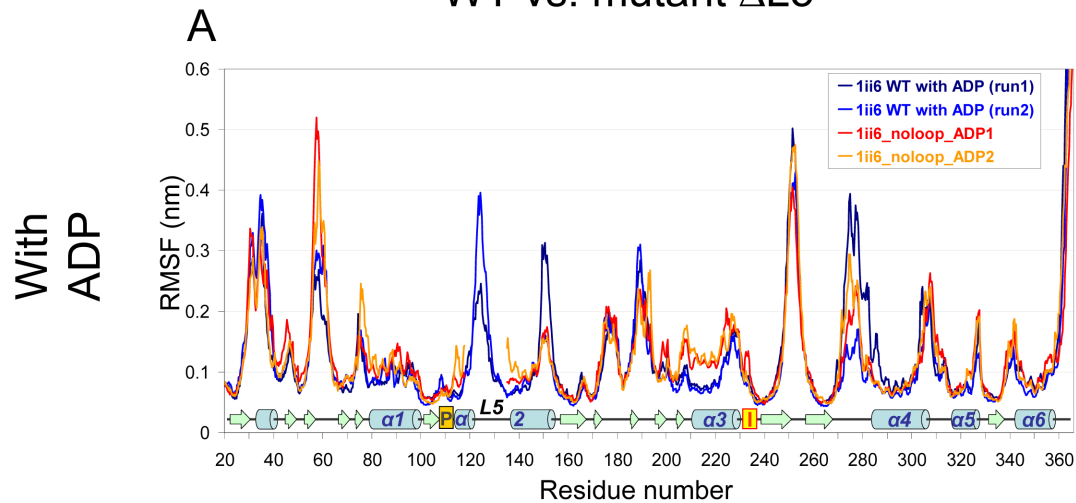

# WT vs. mutant P131A

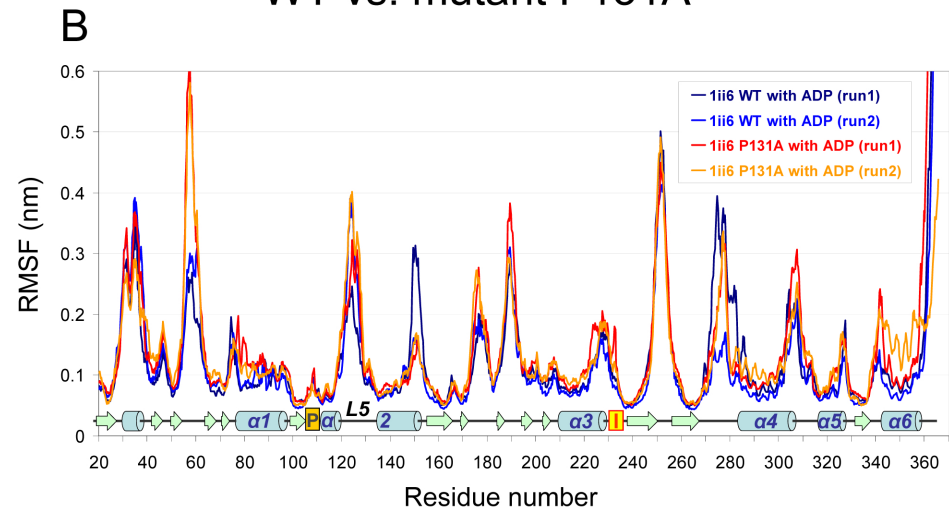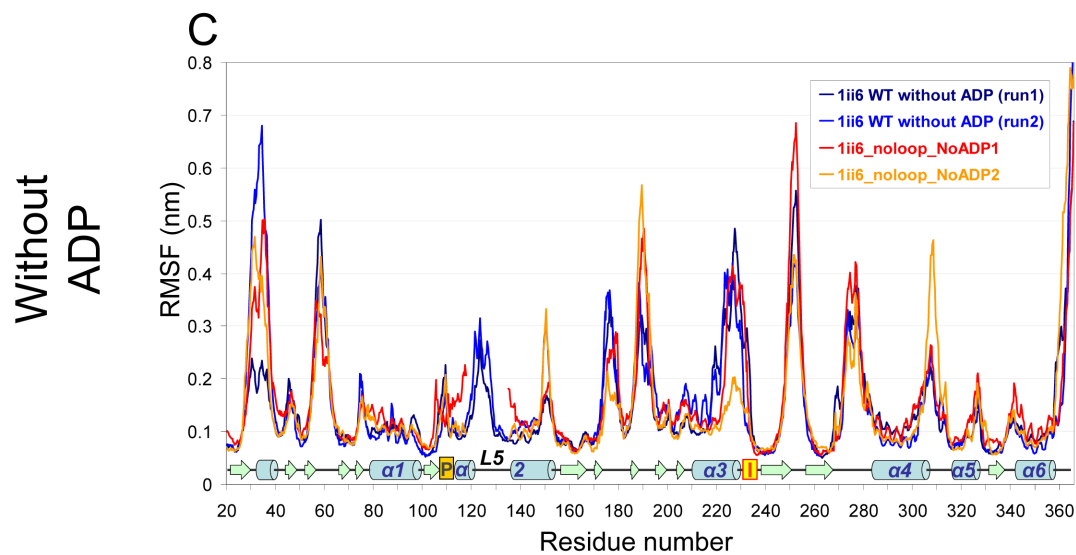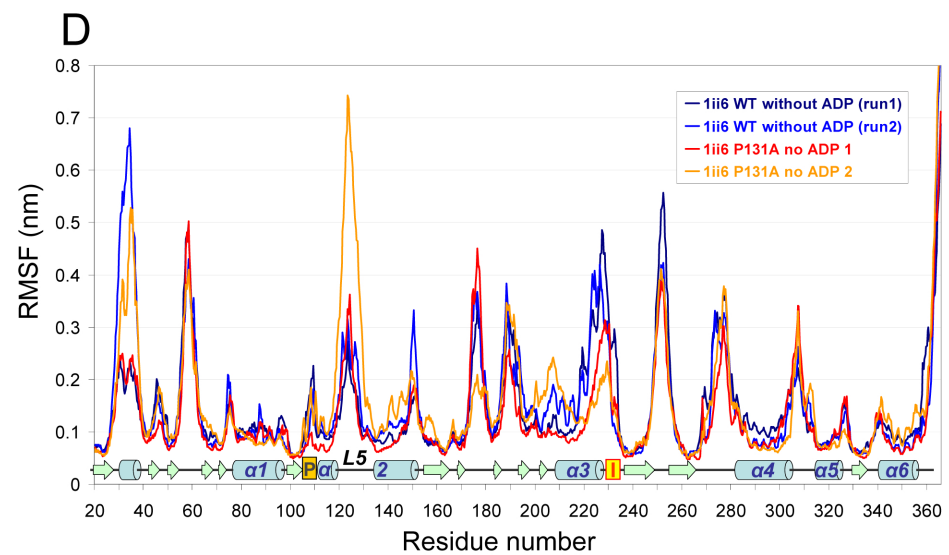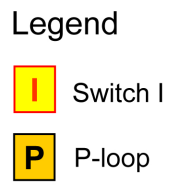

Supplement: supp_M110.192930_jbc.M110.192930-5.pdf [file supp_M110.192930_jbc.M110.192930-5.pdf]
